# Supplementary material
Source: PubMed Central journal article supplement (PMC6256794)
Supplement: zac012187654s1.pdf [file zac012187654s1.pdf]

## Supplementary Tables

**Supplementary table S1. Subgroup analysis of ECG measurements after each course of DHA/PQP by sex and age.**

| Time               | Measurement       | Sex        |            |                  | Age        |             |         |
|--------------------|-------------------|------------|------------|------------------|------------|-------------|---------|
|                    |                   | Male       | Female     | p-value          | <15 years  | Adult       | p-value |
| <b>52h</b> course1 | <b>QTcF (ms)</b>  | 406.9±19.4 | 427.1±23.1 | <b>&lt;0.001</b> | 416.4±21.1 | 416.9± 23.9 | 0.961   |
|                    | <b>ΔQTcF (ms)</b> | 13.5±12.2  | 25.8±20.5  | <b>0.003</b>     | 21.4±22.1  | 19.4±17.4   | 0.772   |
| <b>52h</b> course2 | <b>QTcF (ms)</b>  | 416.2±21.1 | 425.8±17.7 | <b>0.047</b>     | 414.3±15.4 | 421.8±20.3  | 0.351   |
|                    | <b>ΔQTcF (ms)</b> | 22.7±15.9  | 24.5±14.9  | 0.627            | 19.3±17.8  | 24.1±15.1   | 0.433   |
| <b>52h</b> course3 | <b>QTcF (ms)</b>  | 407.5±22.9 | 421.3±22.5 | <b>0.014</b>     | 408.3±18.3 | 415.0±24.2  | 0.481   |
|                    | <b>ΔQTcF (ms)</b> | 14.3±15.5  | 20.1±18.4  | 0.158            | 13.3±21.3  | 17.6±16.7   | 0.534   |

Legend: Results of paired t-test between different subgroups of sex and age per each point of time. Results are mean ± Standard Deviation (SD).

P-value corresponds to the results of the paired T-test. Abbreviations: ms= milliseconds; bpm= beats per minute. Statistically significant results are reflected in bold.

**Supplementary table S2. Comparison of QTcF segment and  $\Delta$ QTcF 7-days after treatment completion**

| <b>ECG parameter<br/>(units)</b>    | <b>7d course1</b>  | <b>7d course2</b>  |                | <b>7d course3</b>  |                |
|-------------------------------------|--------------------|--------------------|----------------|--------------------|----------------|
|                                     | <b>measurement</b> | <b>Measurement</b> | <b>p-value</b> | <b>Measurement</b> | <b>p-value</b> |
| <b>QTcF (ms)</b>                    | 405.7±20.9         | 407.7± 22.7        | 0.09           | 407.7±22.4         | 0.37           |
| <b><math>\Delta</math>QTcF (ms)</b> | 8.0±15.7           | 11.1±16.2          | 0.09           | 11.2±17.0          | 0.37           |

Legend: Results of measurements and p-values for the paired t-test for comparison with course 1 measurements.

Measurements are described in mean  $\pm$  Standard Deviation (SD). Abbreviations: ms= milliseconds.

**Supplementary table S3. Electrocardiographic measurements (QTcF and ΔQTcF not included) at 52 hours post dose during the second and third monthly course with dihydroartemisinin-piperaquine compared with the first month.**

| ECG                  |                       |                        |                        |         |                             |                        |              |                             |
|----------------------|-----------------------|------------------------|------------------------|---------|-----------------------------|------------------------|--------------|-----------------------------|
| parameter<br>(units) | 0h <sub>course1</sub> | 52h <sub>course1</sub> | 52h <sub>course2</sub> | p-value | Risk difference<br>(95% CI) | 52h <sub>course3</sub> | p-value      | Risk difference<br>(95% CI) |
| HR (bpm)             | 68.4±12.4             | 66.1±12.8              | 65.6±11.8              | 0.685   | -0.5 (-3.0 to 2.0)          | 68.2±12.5              | 0.060        | 2.1 (-0.1 to 4.4)           |
| ΔHR (bpm)            | -                     | -2.0±9.8               | -2.6±9.5               | 0.689   | -0.5 (-2.9 to 1.9)          | 0.2±10.2               | <b>0.047</b> | <b>2.2 (0.0 to 4.4)</b>     |
| PR (ms)              | 166.9±18.7            | 171.8±17.8             | 171.8±18.2             | 0.986   | 0.0 (-1.7 to 1.6)           | 172.3±20.2             | 0.714        | 0.5 (-2.1 to 3.1)           |
| ΔPR (ms)             | -                     | 4.8±7.8                | 4.8±8.4                | 0.987   | 0.0 (-1.7 to 1.7)           | 5.6±11.5               | 0.536        | 0.8 (-1.8 to 3.4)           |
| QRS (ms)             | 90.9±9.5              | 89.3±9.0               | 90.0±8.8               | 0.176   | 0.7 (-0.3 to 1.8)           | 88.9±8.8               | 0.534        | -0.4 (-1.6 to 0.9)          |
| ΔQRS (ms)            | -                     | -1.2±4.9               | -0.5±4.6               | 0.158   | 0.7 (-0.3 to 1.7)           | -1.8±5.0               | 0.323        | -0.6 (-1.8 to 0.6)          |

Legend: 52h readings were conducted 4h after administration of the third dose. The parameter measurements are the arithmetic mean of

measurements from the triplicate reading. Results of measurements, p-values and 95% CI for the paired t-test for comparison with measurement

of 52h course1. Measurements are described in mean ± Standard Deviation (SD). Abbreviations: bpm= beats per minute; ms= milliseconds.

Statistically significant results are reflected in bold.

**Supplementary Table S4. Electrocardiographic measurements (QTcF and QTCF not included) at 7 days after the start of each course of DHA/PQP and before the start (at 0 hours) of the following monthly course compared with 0h measurements on day0 first course.**

| ECG parameter<br>(units) | 0h <sub>course1</sub> | 7d <sub>course1</sub> |                  | 0h <sub>course2</sub> |                  | 7d <sub>course2</sub> |                  | 0h <sub>course3</sub> |                  | 7d <sub>course3</sub> |                  |
|--------------------------|-----------------------|-----------------------|------------------|-----------------------|------------------|-----------------------|------------------|-----------------------|------------------|-----------------------|------------------|
|                          |                       | measurement           | p-value          |
| <b>HR (bpm)</b>          | 68.4±12.4             | 76.7±14.0             | <b>&lt;0.001</b> | 70.6±11.4             | 0.091            | 74.4±13.6             | <b>&lt;0.001</b> | 67.5±11.1             | 0.539            | 72.1±11.4             | <b>0.020</b>     |
| <b>ΔHR (bpm)</b>         | -                     | 8.2±13.4              | -                | 2.3±10.8              | -                | 5.6±12.2              | -                | -0.9±12.3             | -                | 3.2±10.4              | -                |
| <b>PR (ms)</b>           | 166.9±18.7            | 166.0±17.4            | 0.309            | 175.4±19.5            | <b>&lt;0.001</b> | 167.5±16.8            | 0.982            | 173.7±20.7            | <b>&lt;0.001</b> | 165.1±17.4            | 0.010            |
| <b>ΔPR (ms)</b>          | -                     | -1.6±10.3             | -                | 8.2±11.7              | -                | -0.1±10.6             | -                | 6.8±13.6              | -                | -3.3±9.5              | -                |
| <b>QRS (ms)</b>          | 90.9±9.5              | 86.5±8.3              | <b>&lt;0.001</b> | 88.5±8.8              | <b>0.003</b>     | 87.2±8.4              | <b>&lt;0.001</b> | 87.3±8.7              | <b>&lt;0.001</b> | 86.3±8.4              | <b>&lt;0.001</b> |
| <b>ΔQRS (ms)</b>         | -                     | -4.8±6.6              | -                | -2.6±6.6              | -                | -3.9±6.1              | -                | -3.65±6.0             | -                | -3.8±6.3              | -                |

Legend: Results of measurements and p-values for the paired t-test for comparison with baseline 0h<sub>course1</sub> measurements. Measurements are described in mean ± Standard Deviation (SD). Abbreviations: bpm= beats per minute, ms= milliseconds. Statistically significant results are reflected in bold.
